# Supplementary material for: Design of highly active cobalt catalysts for CO2 hydrogenation via the tailoring of surface orientation of nanostructures
Source: Royal Society of Chemistry journal article supplement (doi:10.1039/c9cy00402e), 2019-01-01
Supplement: c9cy00402e1.pdf [file c9cy00402e1.pdf]

## Design of Highly Active Cobalt Catalysts for CO<sub>2</sub> Hydrogenation via the Tailoring of Surface Orientation of Nanostructures

Juan D. Jimenez, Cun Wen, and Jochen Lauterbach\*

Department of Chemical Engineering, University of South Carolina, Columbia, SC 29208

lauteraj@cec.sc.edu

### Supplemental Information

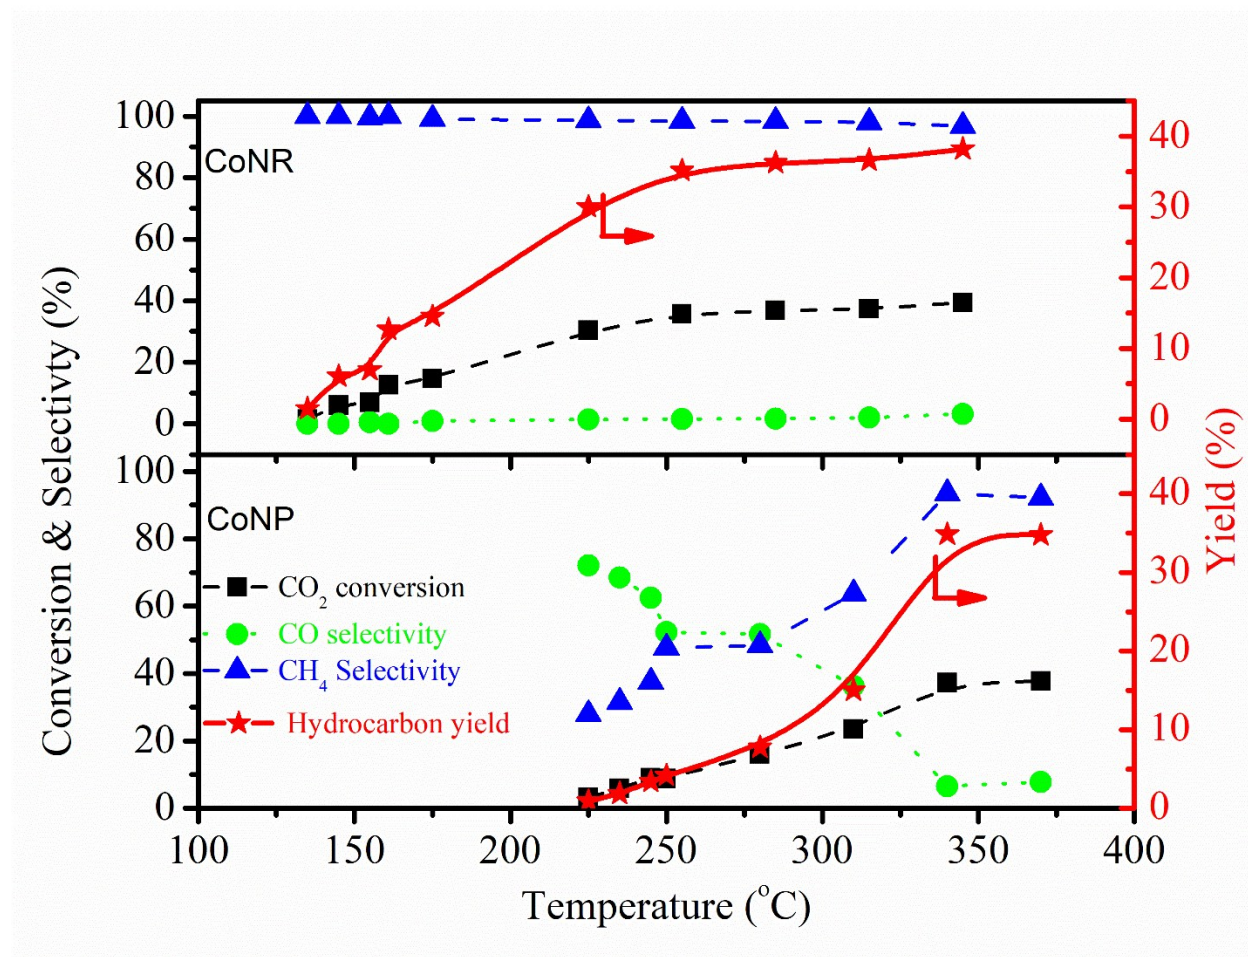

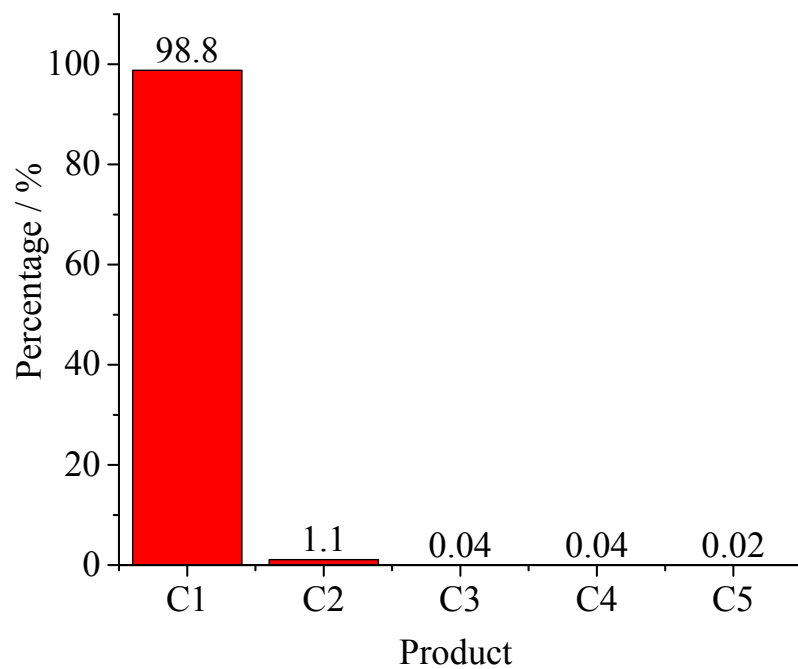

Figure S1. (top) CO<sub>2</sub> conversion and methane selectivity on nanorods and nanoparticles for CO<sub>2</sub> hydrogenation with H<sub>2</sub> to CO<sub>2</sub> ratio of 2 (bottom) product distribution for CO<sub>2</sub> hydrogenation using a 4:1 ratio of CO<sub>2</sub>:H<sub>2</sub>

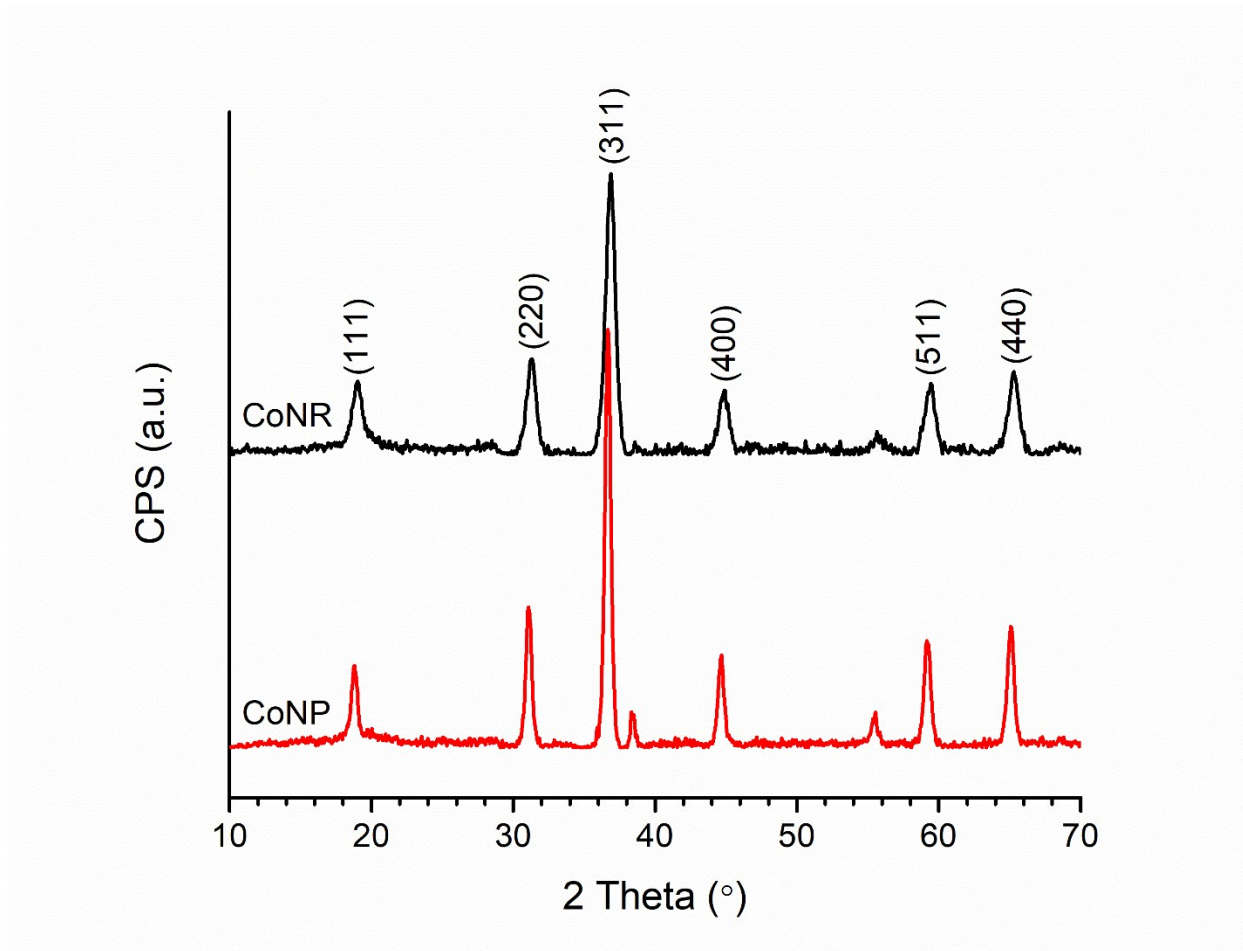

Figure S2. XRD patterns of cobalt nanorods (black) and nanoparticles (red)

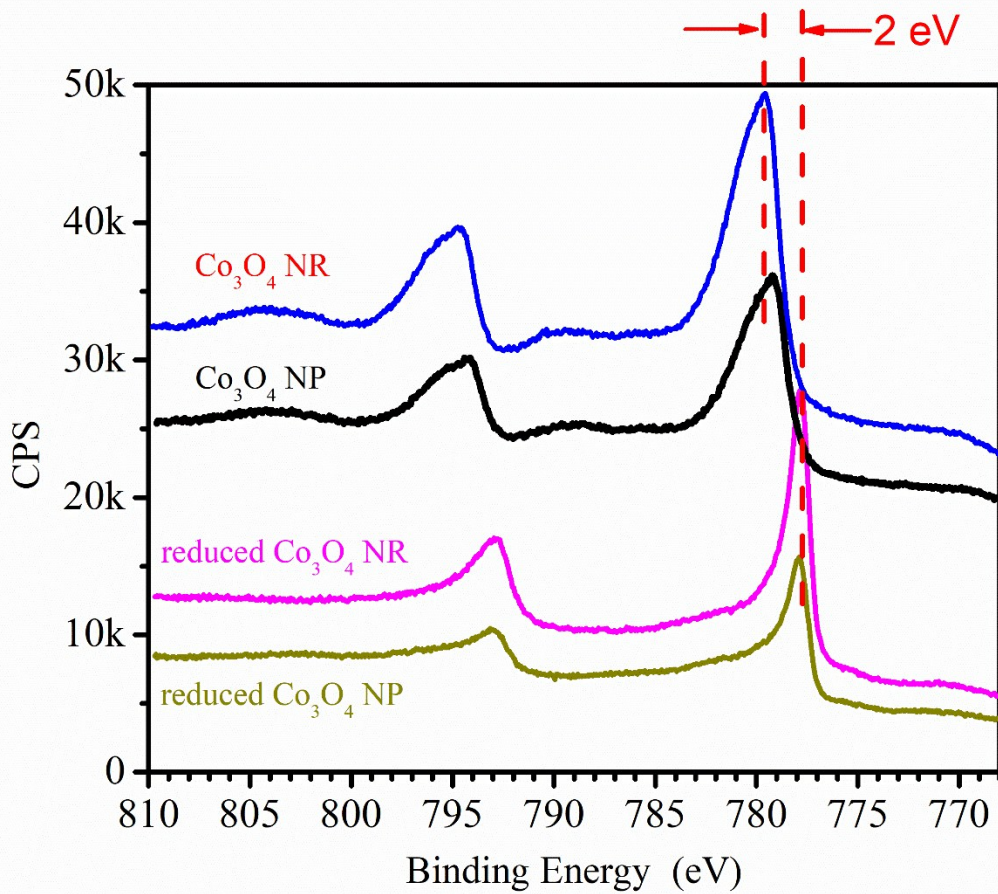

Figure S3: XPS of the reduced cobalt catalyst at 450°C under pure hydrogen for 3 hours.

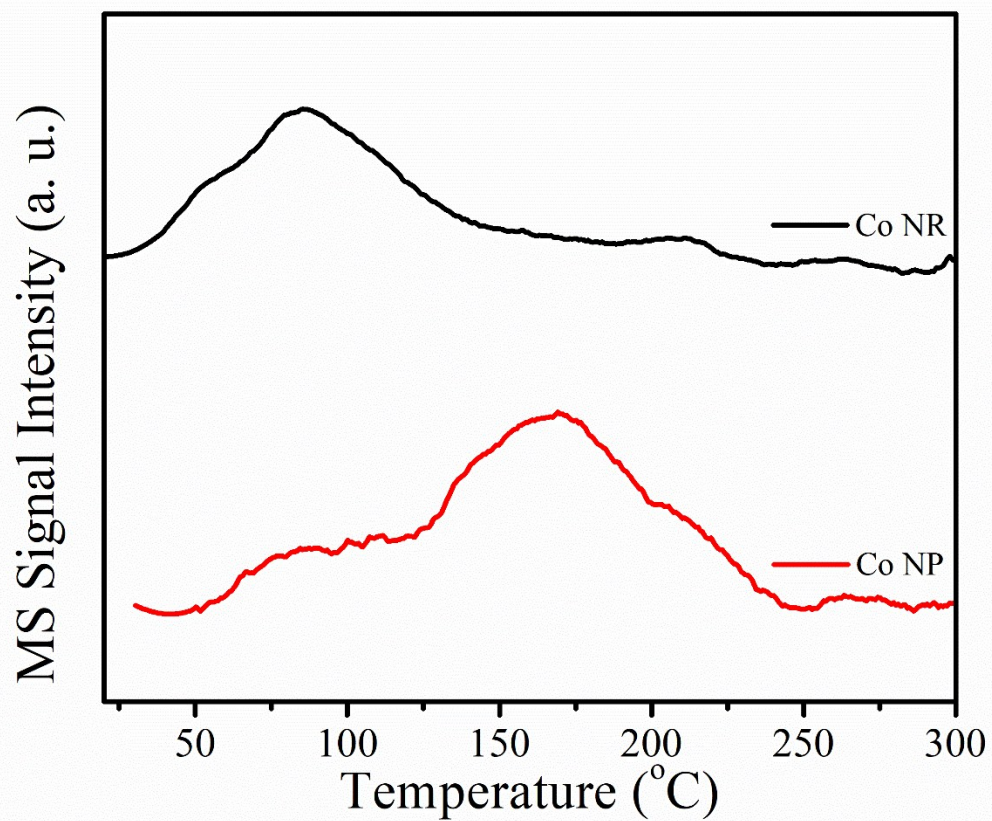

Figure S4. CO<sub>2</sub> TPD profiles on nanorods and nanoparticles, mass 44 is tracked in the mass spectrometer for CO<sub>2</sub>.

**a**

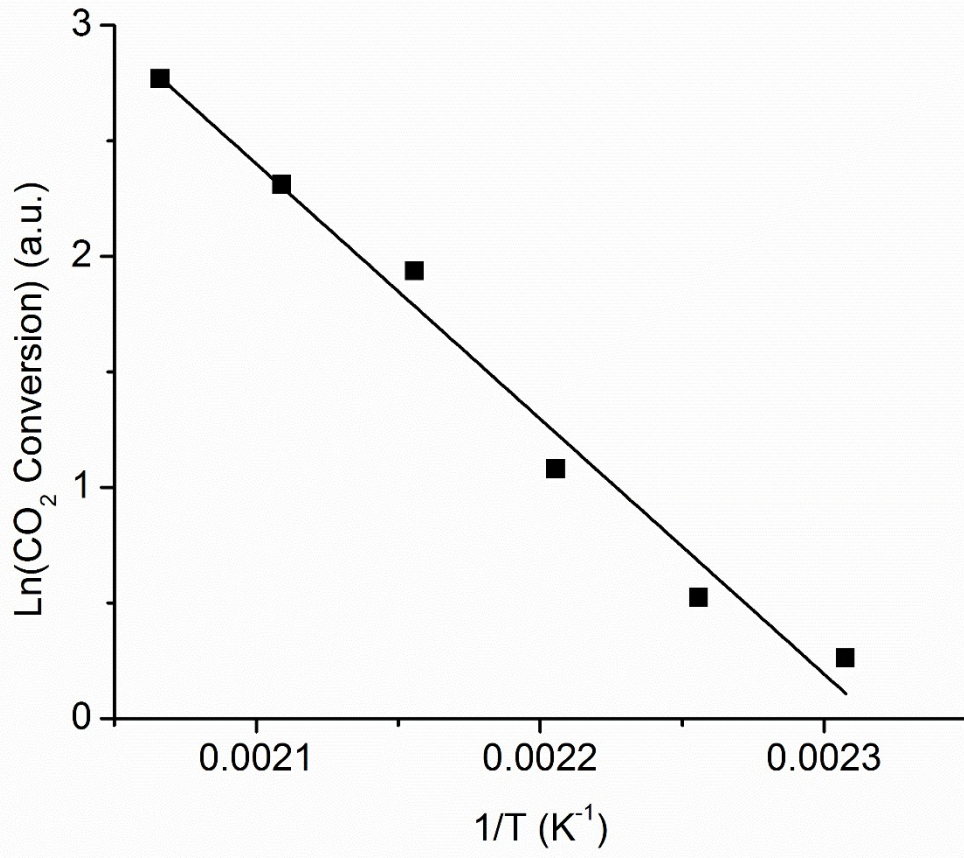

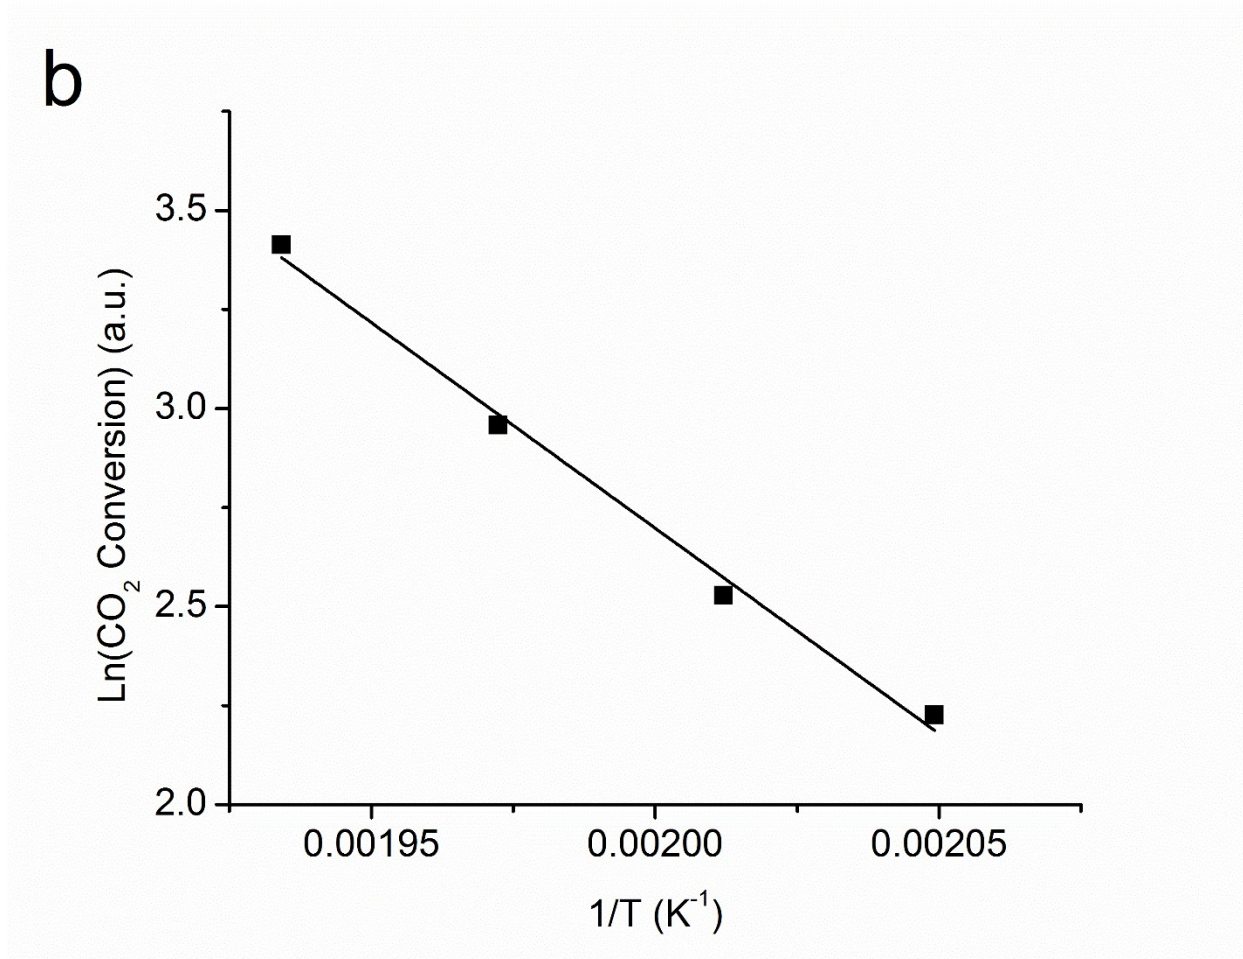

Figure S5. Arrhenius plot of CO<sub>2</sub> hydrogenation on a) nanorods and b) nanoparticles.

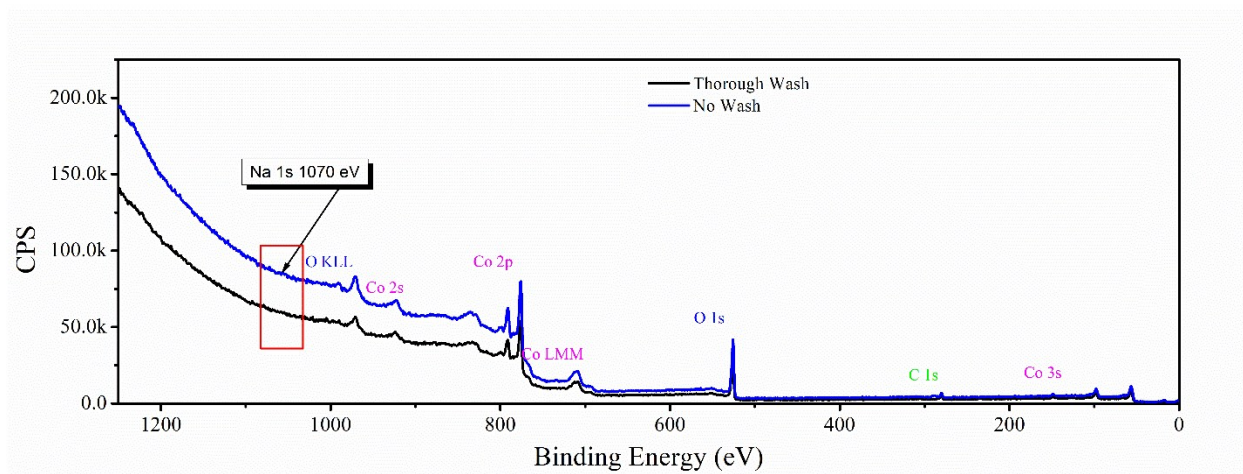

Figure S6. XPS survey scan of Co nanorods and nanoparticles

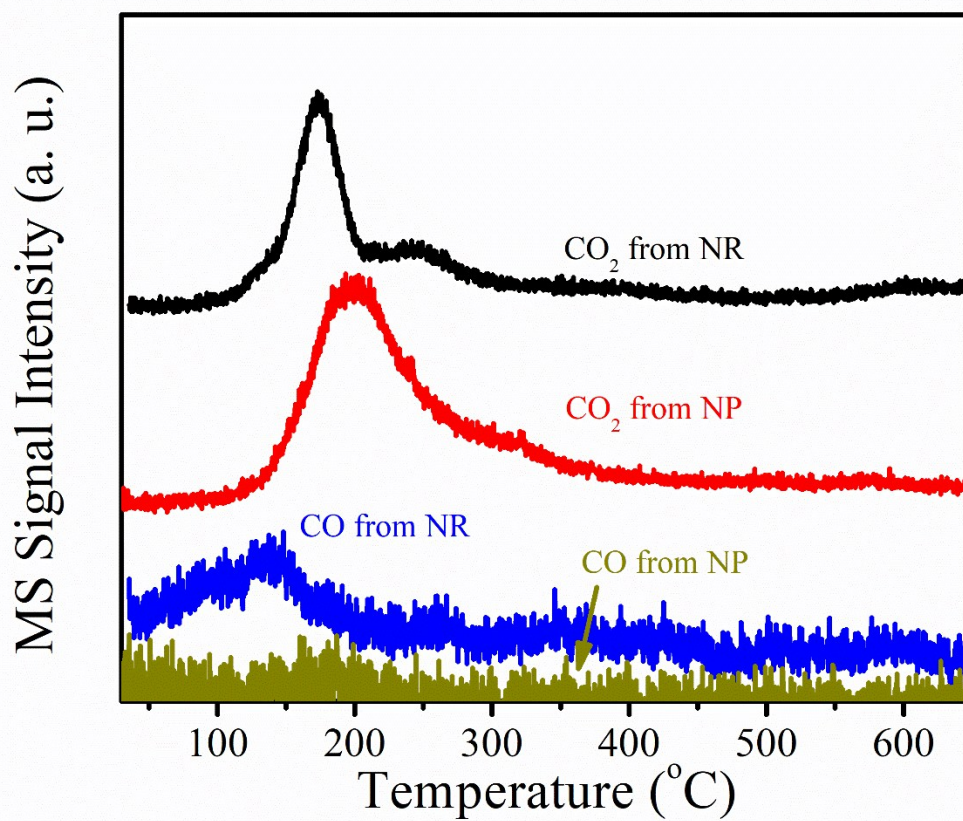

Figure S7. CO TPD profiles on nanorods and nanoparticles, mass 28 and 44 are tracked in the mass spectrometer for CO and CO<sub>2</sub>.



Table S1: Comparison of selected outstanding catalyst for CO<sub>2</sub> hydrogenation

| <i>Catalyst</i>                                     | <i>H<sub>2</sub>:CO<sub>2</sub></i><br><i>Ratio</i> | <i>Temp.</i><br><i>°C</i> | <i>Pressure</i><br><i>MPa</i> | <i>CO<sub>2</sub> Conv.</i><br><i>(%)</i> | <i>CH<sub>4</sub> Sel.</i><br><i>(%)</i> | <i>TOF of CH<sub>4</sub>*</i><br><i>(s<sup>-1</sup>)</i> | <i>Ref.</i> |
|-----------------------------------------------------|-----------------------------------------------------|---------------------------|-------------------------------|-------------------------------------------|------------------------------------------|----------------------------------------------------------|-------------|
| Co/SiO <sub>2</sub>                                 | 3:1                                                 | 300                       | 6.0                           | N/A                                       | ~40                                      | 0.030                                                    | [1]         |
| Ru/TiO <sub>2</sub>                                 | 4:1                                                 | 160                       | 0.1                           | 100                                       | 100                                      | 0.015                                                    | [2]         |
| 0.1%Ru/Al <sub>2</sub> O <sub>3</sub>               | 3:1                                                 | 350                       | 0.1                           | ~2                                        | ~0                                       | 0.83                                                     | [3]         |
| NGQDs/Al <sub>2</sub> O <sub>3</sub>                | 4:1                                                 | 359                       | 1.0                           | 41                                        | 26                                       | 1.57                                                     | [4]         |
| Ni/Ce <sub>x</sub> Zr <sub>1-x</sub> O <sub>2</sub> | 4:1                                                 | 350                       | 0.1                           | 79                                        | 99                                       | 0.426                                                    | [5]         |
| PtCo/TiO <sub>2</sub>                               | 2:1                                                 | 300                       | 0.1                           | 8.2                                       | 85                                       | 0.51                                                     | [6]         |
| CoNR                                                | 4:1                                                 | 220                       | 1.0                           | 57                                        | 98                                       | 2.83                                                     | This        |
| CoNP                                                | 4:1                                                 | 220                       | 1.0                           | 7.3                                       | 15                                       | 0.05                                                     | Work        |

\*Turnover frequency (TOF) was calculated based on the turnover number of CO<sub>2</sub> (mol<sub>CO<sub>2</sub></sub>·g<sub>cat</sub><sup>-1</sup>·s<sup>-1</sup>) normalized by the number of active sites measured via CO chemisorption (mol<sub>CO</sub>·g<sub>cat</sub><sup>-1</sup>). The TOF of CH<sub>4</sub> is equivalent to the TOF of CO<sub>2</sub> multiplied by its selectivity towards methane. TOF values taken from literature were used as originally reported.

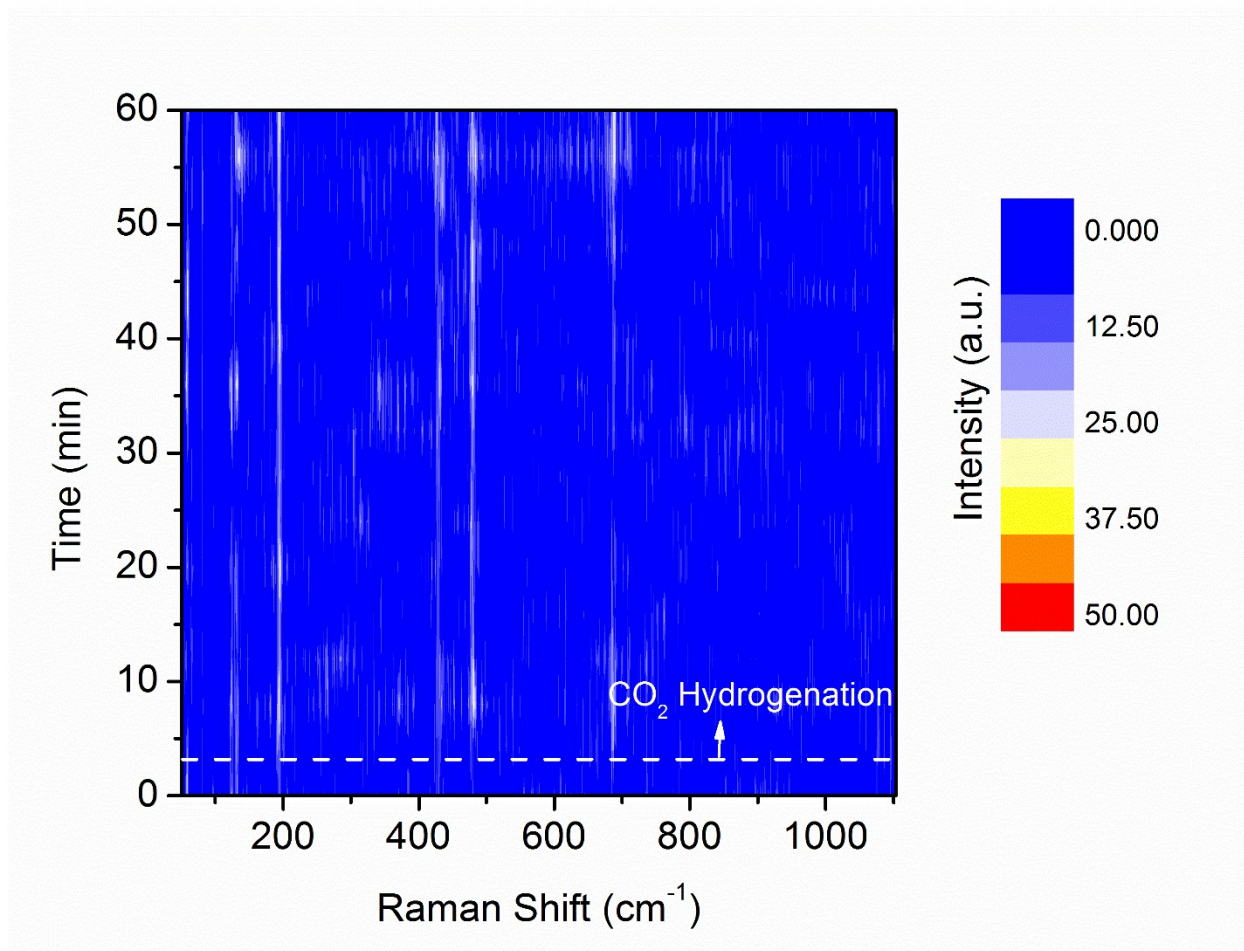

Figure S8: *in situ* Raman spectra of the Co nanoparticles. 450°C H<sub>2</sub> for 3hr pretreatment, 4:1 H<sub>2</sub> to CO<sub>2</sub> inlet gas composition, operating temperature of 230°C.

#### References

1. V. Iablokov, S. K. Beaumont, S. Alayoglu, V. V. Pushkarev, C. Specht, J. Gao, A. P. Alivisatos, N. Kruse and G. A. Somorjai, *Nano Letters*, 2012, **12**, 3091-3096.
2. T. Abe, M. Tanizawa, K. Watanabe and A. Taguchi, *Energy & Environmental Science*, 2009, **2**, 315-315.
3. J. H. Kwak, L. Kovarik and J. Szanyi, *ACS Catalysis*, 2013, **3**, 2449-2455.
4. J. Wu, C. Wen, X. Zou, J. Jimenez, J. Sun, Y. Xia, M.-T. Fonseca Rodrigues, S. Vinod, J. Zhong, N. Chopra, I. N. Odeh, G. Ding, J. Lauterbach and P. M. Ajayan, *ACS Catalysis*, 2017, DOI: 10.1021/acscatal.7b00729, 4497-4503.
5. P. U. Aldana, F. Ocampo, K. Kobl, B. Louis, F. Thibault-Starzyk, M. Daturi, P. Bazin, S. Thomas and A. Roger, *Catalysis Today*, 2013, **215**, 201-207.
6. S. Kattel, W. Yu, X. Yang, B. Yan, Y. Huang, W. Wan, P. Liu and J. G. Chen, *Angewandte Chemie*, 2016, **128**, 8100-8105
